# Supplementary material
Source: MDPI journal article supplement (https://www.mdpi.com/2073-4433/15/1/87)
Supplement: s1 [file s1]

# Supplementary Materials: A Detailed Limited-Area Atmospheric Energy Cycle for Climate and Weather Studies

Yves Franklin Ngueto <sup>1,\*</sup>, René Laprise <sup>1</sup> and Oumarou Nikiéma <sup>1</sup>

## Supplementary material 1: Effective thermodynamics equation

When using the exact definition for  $a_T$

$$a_T(T) = C_p T_r \left[ \left( \frac{T - T_r}{T_r} \right) - \ln \left( \frac{T}{T_r} \right) \right] \quad (\text{S1.1})$$

the prognostic equation

$$\frac{da_T}{dt} - \frac{R\omega}{p} (T - T_r) - \left( 1 - \frac{T_r}{T} \right) Q = 0 \quad (\text{S1.2})$$

is exact in the sense of resulting from the exact thermodynamic equation

$$C_p \frac{dT}{dt} - \frac{R}{p} \omega T - Q = 0 \quad (\text{S1.3})$$

Let us define  $\chi = \frac{T - T_r}{T_r} = \frac{T}{T_r} - 1$  which is  $\ll 1$  for practical applications. Then

$$\begin{aligned} a_T(T) &= C_p T_r \left[ \left( \frac{T - T_r}{T_r} \right) - \ln \left( \frac{T}{T_r} \right) \right] \\ &= C_p T_r \left[ \chi - \ln(1 + \chi) \right] \\ &= C_p T_r \left[ \chi - \left( \chi - \frac{\chi^2}{2} + \frac{\chi^3}{3} - \dots \right) \right] \\ &= C_p T_r \left[ \frac{\chi^2}{2} - \frac{\chi^3}{3} + \dots \right] \\ &= C_p T_r \left[ \frac{\chi^2}{2} \left( 1 - \frac{2\chi}{3} + \dots \right) \right] \\ &\approx C_p T \frac{\chi^2}{2} \\ &\approx \frac{C_p T_r}{2} \left( \frac{T - T_r}{T_r} \right)^2 \end{aligned} \quad (\text{S1.4})$$

which is the small- $\chi$  approximation used in defining the temperature component of available enthalpy

$$a_T(T) \approx \frac{C_p T_r}{2} \left( \frac{T - T_r}{T_r} \right)^2 \quad (\text{S1.5})$$

Let us now return to the prognostic equation

$$\frac{da_T}{dt} - \frac{R\omega}{p}(T - T_r) - \left(1 - \frac{T_r}{T}\right)Q = 0 \quad (\text{S1.6})$$

and apply systematically the same small- $\chi$  approximation. Consider the diabatic contribution

$$\left(1 - \frac{T_r}{T}\right) = \frac{T - T_r}{T_r} \frac{T_r}{T} = \frac{T - T_r}{T_r} (1 + \chi)^{-1} \approx \frac{T - T_r}{T_r} (1 - \chi) \approx \frac{T - T_r}{T_r} \quad (\text{S1.7})$$

So in the small- $\chi$  approximation the corresponding approximate form of the prognostic equation is

$$\frac{da_T}{dt} - \frac{R\omega}{p}(T - T_r) - \left(\frac{T}{T_r} - 1\right)Q \approx 0 \quad (\text{S1.8})$$

Note that this equation is slightly different from eq. (S1.6).

Using this equation corresponds to using an approximate form of the thermodynamic equation, as we shall show here:

$$\begin{aligned} & \frac{da_T}{dt} - \frac{R\omega}{p}(T - T_r) - \left(\frac{T}{T_r} - 1\right)Q \approx 0 \\ \Rightarrow & \frac{C_p}{T_r}(T - T_r) \left[ \frac{dT}{dt} - \frac{\omega R T_r}{p C_p} - \frac{Q}{C_p} \right] \approx 0 \\ \Rightarrow & \frac{dT}{dt} - \frac{\omega \alpha_r}{C_p} - \frac{Q}{C_p} \approx 0 \end{aligned} \quad (\text{S1.9})$$

where

$$\alpha_r = \frac{R T_r}{p}$$

which gives the effective, approximate form of the thermodynamic equation implied by the small- $\chi$  approximation for  $a_T$ . We note that this approximate form of the thermodynamic equation is better than equation (65) in [1] [2] that had also a factor of order unity  $\frac{T_r}{T}$  affecting the diabatic heating term.

**Supplementary material 2: The total kinetic energy equation**

The total kinetic energy equation is obtained as follows:

$$\begin{aligned}
 \frac{\partial K}{\partial t} &= \frac{\partial \left( \frac{1}{2} V_h^2 \right)}{\partial t} \\
 &= \vec{V}_h \cdot \frac{\partial \vec{V}_h}{\partial t} \\
 &= \vec{V}_h \cdot \left( -(\vec{V} \cdot \vec{\nabla}) \cdot \vec{V}_h - f \vec{k} \times \vec{V}_h - \vec{\nabla} \phi + \vec{F}_h \right) \\
 &= -(\vec{V} \cdot \vec{\nabla}) K - \vec{V}_h \cdot \vec{\nabla}_h \phi + \vec{V}_h \cdot \vec{F}_h
 \end{aligned} \tag{S2.1}$$

with

$$\begin{aligned}
 \vec{V}_h \cdot (\vec{\nabla}_h \phi) &= \vec{\nabla}_h \cdot (\vec{V}_h \phi) - \phi (\vec{\nabla}_h \cdot \vec{V}_h) \\
 &= \vec{\nabla}_h \cdot (\phi \vec{V}_h) + \phi \frac{\partial \omega}{\partial p} \\
 &= \vec{\nabla}_h \cdot (\phi \vec{V}_h) + \frac{\partial (\phi \omega)}{\partial p} - \omega \frac{\partial \phi}{\partial p} \\
 &= \vec{\nabla} \cdot (\phi \vec{V}) + \omega \alpha
 \end{aligned}$$

### Supplementary material 3: Time-mean kinetic energy equation associated with time-mean wind

An equation for  $K_M$  is obtained by taking the dot product of the time-mean horizontal winds with the time-mean horizontal momentum equation as follows

$$\begin{aligned} \frac{\partial K_M}{\partial t} &= \langle \vec{V}_h \rangle \cdot \frac{\partial \langle \vec{V}_h \rangle}{\partial t} \\ &= - \langle \vec{V}_h \rangle \cdot \left( \langle \vec{V} \cdot \vec{\nabla} \rangle \cdot \vec{V}_h \right) - \langle \vec{V}_h \rangle \cdot \vec{\nabla} \langle \phi \rangle + \langle \vec{V}_h \rangle \cdot \langle \vec{F}_h \rangle \end{aligned} \quad (\text{S3.1})$$

When applying the following identity from Reynolds averaging rules

$$\langle AB \rangle = \langle A \rangle \langle B \rangle + \langle A' B' \rangle \quad (\text{S3.2})$$

we obtain

$$\begin{aligned} &\langle \vec{V}_h \rangle \cdot \left( \langle \vec{V} \cdot \vec{\nabla} \rangle \cdot \vec{V}_h \right) \\ &= \langle \vec{V}_h \rangle \cdot \left[ \left( \langle \vec{V} \rangle \cdot \vec{\nabla} \right) \cdot \langle \vec{V}_h \rangle + \left( \langle \vec{V}' \cdot \vec{\nabla} \rangle \cdot \vec{V}_h' \right) \right] \\ &= \langle \vec{V}_h \rangle \cdot \left( \langle \vec{V} \rangle \cdot \vec{\nabla} \right) \cdot \langle \vec{V}_h \rangle + \langle \vec{V}_h \rangle \cdot \left( \langle \vec{V}' \cdot \vec{\nabla} \rangle \cdot \vec{V}_h' \right) \\ &= \left( \langle \vec{V} \rangle \cdot \vec{\nabla} \right) \cdot \left( \frac{1}{2} \langle \vec{V}_h \rangle^2 \right) + \langle \langle \vec{V}_h \rangle \cdot \left( \vec{V}' \cdot \vec{\nabla} \right) \cdot \vec{V}_h' \rangle \\ &= \vec{\nabla} \cdot \left( \langle \vec{V} \rangle K_M \right) + \langle \langle \vec{V}_h \rangle \cdot \left( \vec{V}' \cdot \vec{\nabla} \right) \cdot \vec{V}_h' \rangle \\ &= \vec{\nabla} \cdot \left( \langle \vec{V} \rangle K_M \right) + \vec{\nabla} \cdot \left( \langle \vec{V}' \left( \vec{V}_h' \cdot \langle \vec{V}_h \rangle \right) \rangle \right) - \langle \vec{V}_h' \cdot \left( \vec{V}' \cdot \vec{\nabla} \right) \cdot \langle \vec{V}_h \rangle \rangle \end{aligned} \quad (\text{S3.3})$$

so that

$$\begin{aligned} \frac{\partial K_M}{\partial t} &= - \left\{ \vec{\nabla} \cdot \left( \langle \vec{V} \rangle K_M \right) + \vec{\nabla} \cdot \left( \langle \vec{V}' \left( \vec{V}_h' \cdot \langle \vec{V}_h \rangle \right) \rangle \right) - \langle \vec{V}_h' \cdot \left( \vec{V}' \cdot \vec{\nabla} \right) \cdot \langle \vec{V}_h \rangle \rangle \right\} \\ &\quad - \langle \vec{V}_h \rangle \cdot \vec{\nabla} \langle \phi \rangle + \langle \vec{V}_h \rangle \cdot \langle \vec{F}_h \rangle \end{aligned} \quad (\text{S3.4})$$

$A_M$  and  $K_M$  energy reservoirs can be linked as follows:

$$\begin{aligned} \langle \vec{V}_h \rangle \cdot \left( \vec{\nabla}_h \langle \phi \rangle \right) &= \vec{\nabla}_h \cdot \left( \langle \phi \rangle \langle \vec{V}_h \rangle \right) - \langle \phi \rangle \left( \vec{\nabla}_h \cdot \langle \vec{V}_h \rangle \right) \\ &= \vec{\nabla}_h \cdot \left( \langle \phi \rangle \langle \vec{V}_h \rangle \right) - \langle \phi \rangle \left( - \frac{\partial \langle \omega \rangle}{\partial p} \right) \\ &= \vec{\nabla}_h \cdot \left( \langle \phi \rangle \langle \vec{V}_h \rangle \right) + \langle \phi \rangle \left( \frac{\partial \langle \omega \rangle}{\partial p} \right) \\ &= \vec{\nabla}_h \cdot \left( \langle \phi \rangle \langle \vec{V}_h \rangle \right) + \left\{ \frac{\partial \left( \langle \phi \rangle \langle \omega \rangle \right)}{\partial p} - \langle \omega \rangle \frac{\partial \langle \phi \rangle}{\partial p} \right\} \\ &= \vec{\nabla} \cdot \left( \langle \phi \rangle \langle \vec{V} \rangle \right) + \langle \omega \rangle \langle \alpha \rangle \end{aligned} \quad (\text{S3.5})$$

#### Supplementary material 4: Time-mean kinetic energy associated with time-variability of the wind

The easiest way to obtain the time-mean kinetic energy associated with time-variability of the wind is by subtracting the time-mean kinetic energy equation and the kinetic energy equation associated with time-mean wind as follows:

$$\begin{aligned} \frac{\partial K_E}{\partial t} &= \left\langle \vec{V}_h \cdot \frac{\partial \vec{V}_h}{\partial t} \right\rangle - \langle \vec{V}_h \rangle \cdot \frac{\partial \langle \vec{V}_h \rangle}{\partial t} \\ &= - \left\{ \left\langle (\vec{V} \cdot \vec{\nabla}) K \right\rangle - \left\langle \vec{V}_h \right\rangle \cdot \left\langle (\vec{V} \cdot \vec{\nabla}) \cdot \vec{V}_h \right\rangle \right\} - \left\{ \left\langle \vec{V}_h \cdot \vec{\nabla} \phi \right\rangle - \left\langle \vec{V}_h \right\rangle \cdot \left\langle \vec{\nabla} \phi \right\rangle \right\} + \left\{ \left\langle \vec{V}_h \cdot \vec{F}_h \right\rangle - \left\langle \vec{V}_h \right\rangle \cdot \left\langle \vec{F}_h \right\rangle \right\} \end{aligned} \quad (\text{S4.1})$$

Considering

$$\begin{aligned} &\left\langle (\vec{V} \cdot \vec{\nabla}) K \right\rangle \\ &= \vec{\nabla} \cdot \langle \vec{V} K \rangle \\ &= \vec{\nabla} \cdot (\langle \vec{V} \rangle \langle K \rangle) + \vec{\nabla} \cdot \langle \vec{V}' K' \rangle \\ &= \vec{\nabla} \cdot (\langle \vec{V} \rangle (\langle K_M \rangle + \langle K_E \rangle)) + \vec{\nabla} \cdot \left\langle \vec{V}' \left( \frac{1}{2} V_h'^2 - \left\langle \frac{1}{2} V_h'^2 \right\rangle + \langle \vec{V}_h' \rangle \cdot \vec{V}_h' \right) \right\rangle \\ &= \vec{\nabla} \cdot (\langle \vec{V} \rangle K_M) + \vec{\nabla} \cdot (\langle \vec{V} \rangle K_E) + \vec{\nabla} \cdot \left\langle \vec{V}' \left( \frac{1}{2} V_h'^2 \right) \right\rangle + \vec{\nabla} \cdot \langle \vec{V}' (\vec{V}_h' \cdot \vec{V}_h') \rangle \end{aligned} \quad (\text{S4.2})$$

and the identity obtained in eq. (S4.3), we obtain

$$\begin{aligned} &\left\langle (\vec{V} \cdot \vec{\nabla}) K \right\rangle - \langle \vec{V}_h \rangle \cdot \left\langle (\vec{V} \cdot \vec{\nabla}) \cdot \vec{V}_h \right\rangle \\ &= \left[ \vec{\nabla} \cdot (\langle \vec{V} \rangle K_M) + \vec{\nabla} \cdot (\langle \vec{V} \rangle K_E) + \vec{\nabla} \cdot \left\langle \vec{V}' \left( \frac{1}{2} V_h'^2 \right) \right\rangle + \vec{\nabla} \cdot \langle \vec{V}' (\vec{V}_h' \cdot \vec{V}_h') \rangle \right] \\ &\quad - \left[ \vec{\nabla} \cdot (\langle \vec{V} \rangle K_M) + \vec{\nabla} \cdot \langle \vec{V}' (\vec{V}_h' \cdot \vec{V}_h') \rangle - \langle \vec{V}_h' \cdot (\vec{V}' \cdot \vec{\nabla}) \cdot \vec{V}_h' \rangle \right] \\ &= \vec{\nabla} \cdot (\langle \vec{V} \rangle K_E) + \vec{\nabla} \cdot \left\langle \vec{V}' \left( \frac{1}{2} V_h'^2 \right) \right\rangle - \langle \vec{V}_h' \cdot (\vec{V}' \cdot \vec{\nabla}) \cdot \vec{V}_h' \rangle \end{aligned} \quad (\text{S4.3})$$

By doing the same for the frictional term

$$\langle \vec{V}_h \cdot \vec{F}_h \rangle - \langle \vec{V}_h \rangle \cdot \langle \vec{F}_h \rangle = \langle \vec{V}_h' \cdot \vec{F}_h' \rangle \quad (\text{S4.4})$$

so that

$$\begin{aligned} \frac{\partial K_M}{\partial t} &= - \left\{ \vec{\nabla} \cdot (\langle \vec{V} \rangle K_E) + \vec{\nabla} \cdot \left\langle \vec{V}' \left( \frac{1}{2} V_h'^2 \right) \right\rangle - \langle \vec{V}_h' \cdot (\vec{V}' \cdot \vec{\nabla}) \cdot \vec{V}_h' \rangle \right\} \\ &\quad - \langle \vec{V}_h' \cdot \vec{\nabla} \phi' \rangle + \langle \vec{V}_h' \cdot \vec{F}_h' \rangle \end{aligned} \quad (\text{S4.5})$$

The link between  $A_E$  and  $K_E$  can be done by rewritten the term involving geopotential as follows:

$$\begin{aligned}
& \langle \vec{V}_h \cdot \nabla \phi \rangle - \langle \vec{V}_h \rangle \cdot \nabla \langle \phi \rangle \\
= & \left\{ \bar{\nabla} \cdot \langle \phi \vec{V} \rangle + \langle \omega \alpha \rangle \right\} - \left\{ \bar{\nabla} \cdot \left( \langle \phi \rangle \langle \vec{V} \rangle \right) + \langle \omega \rangle \langle \alpha \rangle \right\} \\
= & \bar{\nabla} \cdot \left\{ \langle \phi \vec{V} \rangle - \left( \langle \phi \rangle \langle \vec{V} \rangle \right) \right\} + \left\{ \langle \omega \alpha \rangle - \langle \omega \rangle \langle \alpha \rangle \right\} \\
= & \bar{\nabla} \cdot \langle \phi' \vec{V}' \rangle + \langle \omega' \alpha' \rangle
\end{aligned} \tag{S4.6}$$

### Supplementary material 5: Time-mean available enthalpy equation associated with time-mean temperature

An equation for  $A_M$  is obtained by multiplying  $\frac{C_p}{T_r} \langle T - T_r \rangle$  by the time-mean thermodynamics equation as follows:

$$\begin{aligned} \frac{\partial A_M}{\partial t} &= \frac{C_p}{T_r} \langle T - T_r \rangle \left\langle \frac{\partial T}{\partial t} \right\rangle \\ &= -\frac{C_p}{T_r} \langle T - T_r \rangle \left\langle (\vec{V} \cdot \vec{\nabla}) T \right\rangle + \langle \omega \rangle \frac{R}{p} \langle T - T_r \rangle + \left\langle \left( \frac{T}{T_r} - 1 \right) \right\rangle \langle Q \rangle \end{aligned} \quad (\text{S5.1})$$

Once again, using Reynolds averaging rule eq. (S3.2), we obtain

$$\begin{aligned} &\frac{C_p}{T_r} \langle T - T_r \rangle \left\langle (\vec{V} \cdot \vec{\nabla}) (T - T_r) \right\rangle \\ &= \frac{C_p}{T_r} \langle T - T_r \rangle \left\{ \left\langle (\vec{V}) \cdot \vec{\nabla} \right\rangle \langle T - T_r \rangle + \left\langle (\vec{V}') \cdot \vec{\nabla} \right\rangle T' \right\} \\ &= \vec{\nabla} \cdot \left( \langle \vec{V} \rangle A_M \right) + \frac{C_p}{T_r} \left\langle \langle T - T_r \rangle (\vec{V}') \cdot \vec{\nabla} T' \right\rangle \\ &= \vec{\nabla} \cdot \left( \langle \vec{V} \rangle A_M \right) + \vec{\nabla} \cdot \left\langle \vec{V}' \left( \frac{C_p}{T_r} T' \langle T - T_r \rangle \right) \right\rangle - \frac{C_p}{T_r} \left( \langle T' \vec{V}' \rangle \cdot \vec{\nabla} \right) \langle T - T_r \rangle \\ &= \vec{\nabla} \cdot \left( \langle \vec{V} \rangle A_M \right) + \vec{\nabla} \cdot \left\langle \vec{V}' \left( \frac{C_p}{T_r} T' \langle T - T_r \rangle \right) \right\rangle - \frac{C_p}{T_r} \left( \langle T' \vec{V}' \rangle \cdot \vec{\nabla} \right) \langle T \rangle \end{aligned} \quad (\text{S5.2})$$

so that

$$\begin{aligned} \frac{\partial A_M}{\partial t} &= - \left\{ \vec{\nabla} \cdot \left( \langle \vec{V} \rangle A_M \right) + \vec{\nabla} \cdot \left\langle \vec{V}' \left( \frac{C_p}{T_r} T' \langle T - T_r \rangle \right) \right\rangle - \frac{C_p}{T_r} \left( \langle T' \vec{V}' \rangle \cdot \vec{\nabla} \right) \langle T \rangle \right\} \\ &\quad + \langle \omega \rangle \langle \alpha \rangle - \langle \omega \rangle \alpha_r + \left\langle \left( \frac{T}{T_r} - 1 \right) \right\rangle \langle Q \rangle \end{aligned} \quad (\text{S5.3})$$

### Supplementary material 6: Time-mean available enthalpy equation associated with time-variability of temperature

An equation for  $A_E$  is obtained by subtracting the time-mean enthalpy equation by the time-mean available enthalpy equation associated with time-mean temperature as follows

$$\begin{aligned} \frac{\partial A_E}{\partial t} &= \frac{C_p}{T_r} \left\langle (T - T_r) \frac{\partial T}{\partial t} \right\rangle - \frac{C_p}{T_r} \langle T - T_r \rangle \left\langle \frac{\partial T}{\partial t} \right\rangle \\ &= - \left[ \left\langle (\bar{V} \cdot \bar{\nabla}) A \right\rangle - \frac{C_p}{T_r} \langle T - T_r \rangle \left\langle (\bar{V} \cdot \bar{\nabla}) T \right\rangle \right] + \left[ \langle \omega \alpha \rangle - \langle \omega \rangle \langle \alpha \rangle \right] + \left[ \left\langle \left( \frac{T}{T_r} - 1 \right) Q \right\rangle - \left\langle \left( \frac{T}{T_r} - 1 \right) \right\rangle \langle Q \rangle \right] \end{aligned} \quad (\text{S6.1})$$

Considering

$$\begin{aligned} &\left\langle (\bar{V} \cdot \bar{\nabla}) A \right\rangle \\ &= \bar{\nabla} \cdot \langle \bar{V} A \rangle \\ &= \bar{\nabla} \cdot \left( \langle \bar{V} \rangle \langle A \rangle \right) + \bar{\nabla} \cdot \langle \bar{V}' A' \rangle \\ &= \bar{\nabla} \cdot \left\{ \langle \bar{V} \rangle \left( \langle A_M \rangle + \langle A_E \rangle \right) \right\} + \bar{\nabla} \cdot \left\langle \bar{V}' \left( \frac{C_p}{2T_r} T'^2 - \left\langle \frac{C_p}{2T_r} T'^2 \right\rangle + \frac{C_p}{T_r} T' \langle T - T_r \rangle \right) \right\rangle \\ &= \bar{\nabla} \cdot \left( \langle \bar{V} \rangle A_M \right) + \bar{\nabla} \cdot \left( \langle \bar{V} \rangle A_E \right) + \bar{\nabla} \cdot \left\langle \bar{V}' \left( \frac{C_p}{2T_r} T'^2 \right) \right\rangle + \bar{\nabla} \cdot \left\langle \bar{V}' \left( \frac{C_p}{T_r} T' \langle T - T_r \rangle \right) \right\rangle \end{aligned} \quad (\text{S6.2})$$

and eq. (S6.2), we obtain

$$\begin{aligned} &\left\langle (\bar{V} \cdot \bar{\nabla}) A \right\rangle - \frac{C_p}{T_r} \langle T - T_r \rangle \left\langle (\bar{V} \cdot \bar{\nabla}) T \right\rangle \\ &= \left[ \bar{\nabla} \cdot \left( \langle \bar{V} \rangle A_M \right) + \bar{\nabla} \cdot \left( \langle \bar{V} \rangle A_E \right) + \bar{\nabla} \cdot \left\langle \bar{V}' \left( \frac{C_p}{2T_r} T'^2 \right) \right\rangle + \bar{\nabla} \cdot \left\langle \bar{V}' \left( \frac{C_p}{T_r} T' \langle T - T_r \rangle \right) \right\rangle \right] \\ &\quad - \left[ \bar{\nabla} \cdot \left( \langle \bar{V} \rangle A_M \right) + \bar{\nabla} \cdot \left\langle \bar{V}' \left( \frac{C_p}{T_r} T' \langle T - T_r \rangle \right) \right\rangle - \frac{C_p}{T_r} \left( \langle T' \bar{V}' \rangle \cdot \bar{\nabla} \right) \langle T \rangle \right] \\ &= \bar{\nabla} \cdot \left( \langle \bar{V} \rangle A_E \right) + \bar{\nabla} \cdot \left\langle \bar{V}' \left( \frac{C_p}{2T_r} T'^2 \right) \right\rangle + \frac{C_p}{T_r} \left( \langle T' \bar{V}' \rangle \cdot \bar{\nabla} \right) \langle T \rangle \end{aligned} \quad (\text{S6.3})$$

According to Reynolds decomposition rules

$$\langle \omega \alpha \rangle - \langle \omega \rangle \langle \alpha \rangle = \langle \omega' \alpha' \rangle \quad (\text{S6.4})$$

$$\left\langle \left( \frac{T}{T_r} - 1 \right) Q \right\rangle - \left\langle \left( \frac{T}{T_r} - 1 \right) \right\rangle \langle Q \rangle = \frac{\langle T' Q' \rangle}{T_r} \quad (\text{S6.5})$$



so that

$$\frac{\partial A_E}{\partial t} = - \left\{ \vec{\nabla} \cdot \left( \langle \vec{V} \rangle A_E \right) + \vec{\nabla} \cdot \left\langle \vec{V} \left[ \frac{C_p}{2T_r} T'^2 \right] \right\rangle + \frac{C_p}{T_r} \left\langle \langle T' \vec{V}' \rangle \cdot \vec{\nabla} \right\rangle \langle T \rangle \right\} + \langle \omega' \alpha' \rangle + \frac{\langle T' Q' \rangle}{T_r} \quad (\text{S6.6})$$

### Supplementary material 7: Instantaneous kinetic energy equation associated with variance of wind fluctuations

An equation for  $K_{x1}$  is obtained by taking the dot product of the time-variability horizontal wind  $\overrightarrow{V}_h'$  with the time-variability momentum equation

$$\begin{aligned} \frac{\partial K_{x1}}{\partial t} &= \overrightarrow{V}_h' \cdot \frac{\partial \overrightarrow{V}_h'}{\partial t} - \left\langle \overrightarrow{V}_h' \cdot \frac{\partial \overrightarrow{V}_h'}{\partial t} \right\rangle \\ &= \overrightarrow{V}_h' \cdot \left( -\left\{ \left( \overrightarrow{V} \cdot \overrightarrow{\nabla} \right) \cdot \overrightarrow{V}_h - \left\langle \left( \overrightarrow{V} \cdot \overrightarrow{\nabla} \right) \cdot \overrightarrow{V}_h \right\rangle \right\} - f \vec{k} \times \overrightarrow{V}_h' - \overrightarrow{\nabla} \phi' + \overrightarrow{F}_h' \right) \\ &\quad - \left\langle \overrightarrow{V}_h' \cdot \left( -\left\{ \left( \overrightarrow{V} \cdot \overrightarrow{\nabla} \right) \cdot \overrightarrow{V}_h - \left\langle \left( \overrightarrow{V} \cdot \overrightarrow{\nabla} \right) \cdot \overrightarrow{V}_h \right\rangle \right\} - f \vec{k} \times \overrightarrow{V}_h' - \overrightarrow{\nabla} \phi' + \overrightarrow{F}_h' \right) \right\rangle \end{aligned} \quad (S7.1)$$

The first advection term may be rewritten using the following Reynolds identity

$$AB - \langle AB \rangle = \langle A \rangle B' + A' \langle B \rangle + A' B' - \langle A' B' \rangle \quad (S7.2)$$

$$\begin{aligned} & -\overrightarrow{V}_h' \cdot \left\{ \left( \overrightarrow{V} \cdot \overrightarrow{\nabla} \right) \cdot \overrightarrow{V}_h - \left\langle \left( \overrightarrow{V} \cdot \overrightarrow{\nabla} \right) \cdot \overrightarrow{V}_h \right\rangle \right\} \\ &= -\overrightarrow{V}_h' \cdot \left\{ \left( \overrightarrow{V}' \cdot \overrightarrow{\nabla} \right) \cdot \overrightarrow{V}_h + \left\langle \left( \overrightarrow{V} \cdot \overrightarrow{\nabla} \right) \cdot \overrightarrow{V}_h \right\rangle + \left( \overrightarrow{V}' \cdot \overrightarrow{\nabla} \right) \cdot \overrightarrow{V}_h' - \left\langle \left( \overrightarrow{V}' \cdot \overrightarrow{\nabla} \right) \cdot \overrightarrow{V}_h' \right\rangle \right\} \\ &= -\overrightarrow{V}_h' \cdot \left( \overrightarrow{V}' \cdot \overrightarrow{\nabla} \right) \cdot \overrightarrow{V}_h - \overrightarrow{\nabla} \cdot \left\{ \left\langle \overrightarrow{V} \right\rangle \cdot \left( \frac{1}{2} V_h'^2 \right) \right\} - \overrightarrow{\nabla} \cdot \left\{ \overrightarrow{V}' \cdot \left( \frac{1}{2} V_h'^2 \right) \right\} + \overrightarrow{V}_h' \cdot \left\langle \left( \overrightarrow{V}' \cdot \overrightarrow{\nabla} \right) \cdot \overrightarrow{V}_h' \right\rangle \\ &= -\overrightarrow{\nabla} \cdot \left\{ \overrightarrow{V} \cdot \left( \frac{1}{2} V_h'^2 \right) \right\} - \overrightarrow{V}_h' \cdot \left( \overrightarrow{V}' \cdot \overrightarrow{\nabla} \right) \cdot \overrightarrow{V}_h + \overrightarrow{V}_h' \cdot \left\langle \left( \overrightarrow{V}' \cdot \overrightarrow{\nabla} \right) \cdot \overrightarrow{V}_h' \right\rangle \end{aligned} \quad (S7.3)$$

Consequently, the second advection term is its time-average

$$\begin{aligned} & \left\langle \overrightarrow{V}_h' \cdot \left\{ \left( \overrightarrow{V} \cdot \overrightarrow{\nabla} \right) \cdot \overrightarrow{V}_h - \left\langle \left( \overrightarrow{V} \cdot \overrightarrow{\nabla} \right) \cdot \overrightarrow{V}_h \right\rangle \right\} \right\rangle \\ &= \overrightarrow{\nabla} \cdot \left\{ \left\langle \overrightarrow{V} \cdot \left( \frac{1}{2} V_h'^2 \right) \right\rangle \right\} + \left\langle \overrightarrow{V}_h' \cdot \left( \overrightarrow{V}' \cdot \overrightarrow{\nabla} \right) \cdot \overrightarrow{V}_h \right\rangle \end{aligned} \quad (S7.4)$$

Terms involving the Coriolis parameter are all equals to zero.

Finally,

$$\begin{aligned} \frac{\partial K_{x1}}{\partial t} &= -\overrightarrow{\nabla} \cdot \left\{ \overrightarrow{V} \cdot \left( \frac{1}{2} V_h'^2 \right) - \left\langle \overrightarrow{V} \cdot \left( \frac{1}{2} V_h'^2 \right) \right\rangle \right\} - \left\{ \overrightarrow{V}_h' \cdot \left( \overrightarrow{V}' \cdot \overrightarrow{\nabla} \right) \cdot \overrightarrow{V}_h - \left\langle \overrightarrow{V}_h' \cdot \left( \overrightarrow{V}' \cdot \overrightarrow{\nabla} \right) \cdot \overrightarrow{V}_h \right\rangle \right\} \\ &\quad + \overrightarrow{V}_h' \cdot \left\langle \left( \overrightarrow{V}' \cdot \overrightarrow{\nabla} \right) \cdot \overrightarrow{V}_h' \right\rangle - \left\{ \overrightarrow{V}_h' \cdot \overrightarrow{\nabla} \phi' - \left\langle \overrightarrow{V}_h' \cdot \overrightarrow{\nabla} \phi' \right\rangle \right\} + \left\{ \overrightarrow{V}_h' \cdot \overrightarrow{F}_h' - \left\langle \overrightarrow{V}_h' \cdot \overrightarrow{F}_h' \right\rangle \right\} \end{aligned} \quad (S7.5)$$

$A_{x1}$  and  $K_{x1}$  energy reservoirs can be linked as follows:

$$\begin{aligned}
& \overline{V_h'} \cdot \overline{\nabla_h} \phi' \\
&= \overline{V_h'} \cdot \overline{\nabla_h} \phi' + \omega' \frac{\partial \phi'}{\partial p} - \omega' \frac{\partial \phi'}{\partial p} \\
&= \overline{V'} \cdot \overline{\nabla} \phi' - \omega' \frac{\partial \phi'}{\partial p} \\
&= \left\{ \overline{\nabla} \cdot (\phi' \overline{V'}) - \phi' (\overline{\nabla} \cdot \overline{V'}) \right\} + \omega' \alpha' \\
&= \overline{\nabla} \cdot (\phi' \overline{V'}) + \omega' \alpha'
\end{aligned} \tag{S7.6}$$

### Supplementary material 8: Instantaneous kinetic energy equation associated with covariance of wind fluctuations and wind time-average

An equation for  $K_{x2}$  is obtained by taking the dot product of time-variability horizontal wind  $\overrightarrow{V_h}'$  with the time-mean momentum equation and the dot product of time-mean horizontal wind  $\langle \overrightarrow{V_h} \rangle$  with the time-variability momentum equation as follows:

$$\begin{aligned} \frac{\partial K_{x2}}{\partial t} &= \overrightarrow{V_h}' \cdot \frac{\partial \langle \overrightarrow{V_h} \rangle}{\partial t} + \langle \overrightarrow{V_h} \rangle \cdot \frac{\partial \overrightarrow{V_h}'}{\partial t} \\ &= \overrightarrow{V_h}' \cdot \left[ -\langle (\overrightarrow{V} \cdot \nabla) \cdot \overrightarrow{V_h} \rangle - f \vec{k} \times \langle \overrightarrow{V_h} \rangle - \nabla \langle \phi \rangle + \langle \overrightarrow{F_h} \rangle \right] \\ &\quad + \langle \overrightarrow{V_h} \rangle \cdot \left[ -\left\{ (\overrightarrow{V} \cdot \nabla) \cdot \overrightarrow{V_h} - \langle (\overrightarrow{V} \cdot \nabla) \cdot \overrightarrow{V_h} \rangle \right\} - f \vec{k} \times \overrightarrow{V_h}' - \nabla \phi' + \overrightarrow{F_h}' \right] \end{aligned} \quad (\text{S8.1})$$

The total wind advection terms is:

$$\begin{aligned} & -\overrightarrow{V_h}' \cdot \langle (\overrightarrow{V} \cdot \nabla) \cdot \overrightarrow{V_h} \rangle - \left[ \langle \overrightarrow{V_h} \rangle \cdot (\overrightarrow{V} \cdot \nabla) \cdot \overrightarrow{V_h} - \langle \overrightarrow{V_h} \rangle \cdot \langle (\overrightarrow{V} \cdot \nabla) \cdot \overrightarrow{V_h} \rangle \right] \\ &= -\overrightarrow{V_h}' \cdot \langle (\overrightarrow{V} \cdot \nabla) \cdot \overrightarrow{V_h} \rangle - \left[ (\overrightarrow{V_h} - \overrightarrow{V_h}') \cdot (\overrightarrow{V} \cdot \nabla) \cdot \overrightarrow{V_h} - \langle \overrightarrow{V_h} \rangle \cdot \langle (\overrightarrow{V} \cdot \nabla) \cdot \overrightarrow{V_h} \rangle \right] \\ &= \overrightarrow{V_h}' \cdot \left[ (\overrightarrow{V} \cdot \nabla) \cdot \overrightarrow{V_h} - \langle (\overrightarrow{V} \cdot \nabla) \cdot \overrightarrow{V_h} \rangle \right] - \overrightarrow{V_h} \cdot (\overrightarrow{V} \cdot \nabla) \cdot \overrightarrow{V_h} + \langle \overrightarrow{V_h} \rangle \cdot \langle (\overrightarrow{V} \cdot \nabla) \cdot \overrightarrow{V_h} \rangle \end{aligned} \quad (\text{S8.2})$$

The first term in bracket has already been decomposed in (S8.3), the second is the advection of the total kinetic energy by the three-dimensional wind vector and the last term is obtained by combining two Reynolds identities:

$$\begin{aligned} \langle A \rangle \langle BC \rangle &= \langle A(BC) \rangle - \langle A'(BC)' \rangle \\ &= \langle ABC \rangle - \langle A'(B'\langle C \rangle + \langle B \rangle C' + B'C' - \langle B'C' \rangle) \rangle \\ &= \langle ABC \rangle - \langle A'B'\langle C \rangle \rangle - \langle A'\langle B \rangle C' \rangle - \langle A'B'C' \rangle \end{aligned} \quad (\text{S8.3})$$

we obtain

$$\begin{aligned}
& \overline{V_h'} \cdot \left[ \left( \overline{V} \cdot \overline{\nabla} \right) \cdot \overline{V_h} - \left\langle \left( \overline{V} \cdot \overline{\nabla} \right) \cdot \overline{V_h} \right\rangle \right] - \overline{V_h} \cdot \left( \overline{V} \cdot \overline{\nabla} \right) \cdot \overline{V_h} + \left\langle \overline{V_h} \right\rangle \cdot \left\langle \left( \overline{V} \cdot \overline{\nabla} \right) \cdot \overline{V_h} \right\rangle \\
& = \left\{ \overline{\nabla} \cdot \left[ \overline{V} \left( \frac{1}{2} \overline{V_h'^2} \right) \right] + \overline{V_h'} \cdot \left( \overline{V'} \cdot \overline{\nabla} \right) \cdot \left\langle \overline{V_h} \right\rangle - \overline{V_h'} \cdot \left\langle \left( \overline{V'} \cdot \overline{\nabla} \right) \cdot \overline{V_h'} \right\rangle \right\} - \overline{\nabla} \cdot \left\{ \overline{V} \cdot K \right\} \\
& + \left\{ \left\langle \overline{V_h} \right\rangle \cdot \left( \overline{V} \cdot \overline{\nabla} \right) \cdot \overline{V_h} \right\rangle - \left\langle \overline{V_h'} \cdot \left( \overline{V'} \cdot \overline{\nabla} \right) \cdot \left\langle \overline{V_h} \right\rangle \right\rangle - \left\langle \overline{V_h'} \cdot \left\langle \left( \overline{V} \right) \cdot \overline{\nabla} \right\rangle \cdot \overline{V_h'} \right\rangle - \left\langle \overline{V_h'} \cdot \left( \overline{V'} \cdot \overline{\nabla} \right) \cdot \overline{V_h'} \right\rangle \right\} \\
& = \left\{ \overline{\nabla} \cdot \left[ \overline{V} \left( \frac{1}{2} \overline{V_h'^2} \right) \right] + \overline{V_h'} \cdot \left( \overline{V'} \cdot \overline{\nabla} \right) \cdot \left\langle \overline{V_h} \right\rangle - \overline{V_h'} \cdot \left\langle \left( \overline{V'} \cdot \overline{\nabla} \right) \cdot \overline{V_h'} \right\rangle \right\} - \overline{\nabla} \cdot \left\{ \overline{V} \cdot K \right\} \\
& + \left\{ \overline{\nabla} \cdot \left\langle \overline{V} \cdot K \right\rangle - \left\langle \overline{V_h'} \cdot \left( \overline{V'} \cdot \overline{\nabla} \right) \cdot \left\langle \overline{V_h} \right\rangle \right\rangle - \overline{\nabla} \cdot \left\langle \overline{V} \left( \frac{1}{2} \overline{V_h'^2} \right) \right\rangle \right\} \\
& = -\overline{\nabla} \cdot \left\{ \overline{V} \left( K - \frac{1}{2} \overline{V_h'^2} \right) - \left\langle \overline{V} \left( K - \frac{1}{2} \overline{V_h'^2} \right) \right\rangle \right\} \\
& + \left\{ \overline{V_h'} \cdot \left( \overline{V'} \cdot \overline{\nabla} \right) \cdot \left\langle \overline{V_h} \right\rangle - \left\langle \overline{V_h'} \cdot \left( \overline{V'} \cdot \overline{\nabla} \right) \cdot \left\langle \overline{V_h} \right\rangle \right\rangle \right\} - \overline{V_h'} \cdot \left\langle \left( \overline{V'} \cdot \overline{\nabla} \right) \cdot \overline{V_h'} \right\rangle
\end{aligned} \tag{S8.4}$$

Terms involving geopotential may be rewritten as follows:

$$\begin{aligned}
\frac{\partial K_{x2}}{\partial t} & = -\overline{\nabla} \cdot \left\{ \overline{V} \left( K - \frac{1}{2} \overline{V_h'^2} \right) - \left\langle \overline{V} \left( K - \frac{1}{2} \overline{V_h'^2} \right) \right\rangle \right\} + \left\{ \overline{V_h'} \cdot \left( \overline{V'} \cdot \overline{\nabla} \right) \cdot \left\langle \overline{V_h} \right\rangle - \left\langle \overline{V_h'} \cdot \left( \overline{V'} \cdot \overline{\nabla} \right) \cdot \left\langle \overline{V_h} \right\rangle \right\rangle \right\} \\
& - \overline{V_h'} \cdot \left\langle \left( \overline{V'} \cdot \overline{\nabla} \right) \cdot \overline{V_h'} \right\rangle - \overline{\nabla} \cdot \left\{ \overline{V_h'} \cdot \overline{\nabla} \left\langle \phi \right\rangle + \left\langle \overline{V_h} \right\rangle \cdot \overline{\nabla} \phi' \right\} + \left\{ \overline{V_h'} \cdot \left\langle \overline{F_h} \right\rangle + \left\langle \overline{V_h} \right\rangle \cdot \overline{F_h'} \right\}
\end{aligned} \tag{S8.5}$$

$A_{x2}$  and  $K_{x2}$  energy reservoirs can be linked as follows:

$$\begin{aligned}
\overline{V_h'} \cdot \overline{\nabla} \left\langle \phi \right\rangle & = \overline{\nabla_h} \cdot \left( \overline{V_h'} \left\langle \phi \right\rangle \right) - \left\langle \phi \right\rangle \left( \overline{\nabla_h} \cdot \overline{V_h'} \right) \\
& = \overline{\nabla_h} \cdot \left( \overline{V_h'} \left\langle \phi \right\rangle \right) + \left\langle \phi \right\rangle \frac{\partial \omega'}{\partial p} \\
& = \left\{ \overline{\nabla_h} \cdot \left( \overline{V_h'} \left\langle \phi \right\rangle \right) + \frac{\partial \omega' \left\langle \phi \right\rangle}{\partial p} \right\} - \omega' \frac{\partial \left\langle \phi \right\rangle}{\partial p} \\
& = \overline{\nabla} \cdot \left( \overline{V'} \left\langle \phi \right\rangle \right) + \omega' \left\langle \alpha \right\rangle
\end{aligned} \tag{S8.6}$$

Likewise

$$\left\langle \overline{V_h} \right\rangle \cdot \overline{\nabla} \phi' = \overline{\nabla} \cdot \left( \left\langle \overline{V} \right\rangle \phi' \right) + \left\langle \omega \right\rangle \alpha' \tag{S8.7}$$

### SUPPLEMENTARY MATERIAL 9: Instantaneous available enthalpy associated with variance of temperature fluctuations

An equation for  $A_{x1}$  is obtained by multiplying  $\frac{C_p}{T_r} T'$  with the time-variability thermodynamics equation

$$\begin{aligned} \frac{\partial A_{x1}}{\partial t} &= \frac{C_p}{T_r} \left( T' \frac{\partial T'}{\partial t} - \left\langle T' \frac{\partial T'}{\partial t} \right\rangle \right) \\ &= \frac{C_p}{T_r} T' \left( - \left\{ \left( \bar{V} \cdot \bar{\nabla} \right) T - \left\langle \left( \bar{V} \cdot \bar{\nabla} \right) T \right\rangle \right\} + \frac{\omega' \alpha_r}{C_p} + \frac{Q'}{C_p} \right) \\ &\quad - \frac{C_p}{T_r} \left\langle T' \left( - \left\{ \left( \bar{V} \cdot \bar{\nabla} \right) T - \left\langle \left( \bar{V} \cdot \bar{\nabla} \right) T \right\rangle \right\} + \frac{\omega' \alpha_r}{C_p} + \frac{Q'}{C_p} \right) \right\rangle \end{aligned} \quad (S9.1)$$

The first advection term may be rewritten as follows:

$$\begin{aligned} & - \frac{C_p}{T_r} T' \left\{ \left( \bar{V} \cdot \bar{\nabla} \right) T - \left\langle \left( \bar{V} \cdot \bar{\nabla} \right) T \right\rangle \right\} \\ &= - \frac{C_p}{T_r} T' \left\{ \left\langle \left( \bar{V} \cdot \bar{\nabla} \right) T' \right\rangle + \left( \bar{V}' \cdot \bar{\nabla} \right) \langle T \rangle + \left( \bar{V}' \cdot \bar{\nabla} \right) T' - \left\langle \left( \bar{V}' \cdot \bar{\nabla} \right) T' \right\rangle \right\} \\ &= - \bar{\nabla} \cdot \left\{ \left\langle \bar{V} \right\rangle \left( \frac{C_p}{2T_r} T'^2 \right) \right\} - \frac{C_p}{T_r} T' \left( \bar{V}' \cdot \bar{\nabla} \right) \langle T \rangle - \bar{\nabla} \cdot \left\{ \bar{V}' \left( \frac{C_p}{2T_r} T'^2 \right) \right\} + \frac{C_p}{T_r} T' \left\langle \left( \bar{V}' \cdot \bar{\nabla} \right) T' \right\rangle \\ &= - \bar{\nabla} \cdot \left\{ \bar{V} \left( \frac{C_p}{2T_r} T'^2 \right) \right\} - \frac{C_p}{T_r} T' \left( \bar{V}' \cdot \bar{\nabla} \right) \langle T \rangle + \frac{C_p}{T_r} T' \left\langle \left( \bar{V}' \cdot \bar{\nabla} \right) T' \right\rangle \end{aligned} \quad (S9.2)$$

Consequently, the second advection term is its time-average

$$\begin{aligned} & \frac{C_p}{T_r} T' \left\{ \left( \bar{V} \cdot \bar{\nabla} \right) T - \left\langle \left( \bar{V} \cdot \bar{\nabla} \right) T \right\rangle \right\} \\ &= \bar{\nabla} \cdot \left\{ \left\langle \bar{V} \left( \frac{C_p}{2T_r} T'^2 \right) \right\rangle \right\} + \frac{C_p}{T_r} \left\langle T' \left( \bar{V}' \cdot \bar{\nabla} \right) \langle T \rangle \right\rangle \end{aligned} \quad (S9.3)$$

so that

$$\begin{aligned} \frac{\partial A_{x1}}{\partial t} &= - \bar{\nabla} \cdot \left\{ \bar{V} \left( \frac{C_p}{2T_r} T'^2 \right) - \left\langle \bar{V} \left( \frac{C_p}{2T_r} T'^2 \right) \right\rangle \right\} - \frac{C_p}{T_r} \left\{ \left( T' \bar{V}' \cdot \bar{\nabla} \right) \langle T \rangle - \left\langle \left( T' \bar{V}' \cdot \bar{\nabla} \right) \langle T \rangle \right\rangle \right\} \\ &\quad + \frac{C_p}{T_r} T' \left\langle \left( \bar{V}' \cdot \bar{\nabla} \right) T' \right\rangle + \left\{ \omega' \alpha' - \langle \omega' \alpha' \rangle \right\} + \frac{1}{T_r} \left\{ T' Q' - \langle T' Q' \rangle \right\} \end{aligned} \quad (S9.4)$$

### SUPPLEMENTARY MATERIAL 10: Instantaneous available enthalpy associated with covariance of temperature fluctuations and wind time-average

An equation for  $A_{X2}$  is obtained by multiplying  $\frac{C_p}{T_r} T'$  with the time-mean thermo-

dynamics equation and  $\frac{C_p}{T_r} \langle T - T_r \rangle$  with the time-variability thermodynamics equation as follows:

$$\begin{aligned} \frac{\partial A_{X2}}{\partial t} &= \frac{C_p}{T_r} \left( T' \frac{\partial \langle T \rangle}{\partial t} + \langle T - T_r \rangle \frac{\partial T'}{\partial t} \right) \\ &= \frac{C_p}{T_r} T' \left( -\langle (\vec{V} \cdot \vec{\nabla})(T - T_r) \rangle + \frac{\langle \omega \rangle \alpha_r}{C_p} + \frac{\langle Q \rangle}{C_p} \right) \\ &\quad + \frac{C_p}{T_r} \langle T - T_r \rangle \left( -\left\{ (\vec{V} \cdot \vec{\nabla})(T - T_r) - \langle (\vec{V} \cdot \vec{\nabla})(T - T_r) \rangle \right\} + \frac{\omega' \alpha_r}{C_p} + \frac{Q'}{C_p} \right) \end{aligned} \quad (S10.1)$$

Considering

$$\begin{aligned} &-T' \langle (\vec{V} \cdot \vec{\nabla})(T - T_r) \rangle - \left[ \langle T - T_r \rangle (\vec{V} \cdot \vec{\nabla})(T - T_r) - \langle T - T_r \rangle \langle (\vec{V} \cdot \vec{\nabla})(T - T_r) \rangle \right] \\ &= -T' \langle (\vec{V} \cdot \vec{\nabla})T \rangle - \left[ \langle T - T_r \rangle (\vec{V} \cdot \vec{\nabla})T - \langle T - T_r \rangle \langle (\vec{V} \cdot \vec{\nabla})T \rangle \right] \\ &= -T' \langle (\vec{V} \cdot \vec{\nabla})T \rangle - \left[ (T - T' - T_r) (\vec{V} \cdot \vec{\nabla})T - \langle T - T_r \rangle \langle (\vec{V} \cdot \vec{\nabla})T \rangle \right] \\ &= -T' \langle (\vec{V} \cdot \vec{\nabla})T \rangle - \left[ \{ (T - T_r) - T' \} (\vec{V} \cdot \vec{\nabla})T - \langle T - T_r \rangle \langle (\vec{V} \cdot \vec{\nabla})T \rangle \right] \\ &= T' \left[ (\vec{V} \cdot \vec{\nabla})T - \langle (\vec{V} \cdot \vec{\nabla})T \rangle \right] - (T - T_r) (\vec{V} \cdot \vec{\nabla})T + \langle T - T_r \rangle \langle (\vec{V} \cdot \vec{\nabla})T \rangle \end{aligned} \quad (S10.2)$$

The first term into bracket has already been evaluated in eq. (S9.2), the second is proportional to the advection of the total available enthalpy by the three-dimensional wind vector and the last term is obtained using the combination of two Reynolds identity developed in eq. (S8.3) as follows:

$$\begin{aligned} &\langle T - T_r \rangle \langle (\vec{V} \cdot \vec{\nabla})T \rangle \\ &= \langle (T - T_r) (\vec{V} \cdot \vec{\nabla})T \rangle + \langle T' (\vec{V} \cdot \vec{\nabla}) \langle T \rangle \rangle + \langle T' \langle (\vec{V} \cdot \vec{\nabla})T' \rangle \rangle - \langle T' (\vec{V}' \cdot \vec{\nabla})T' \rangle \\ &= \vec{\nabla} \cdot \left\langle \vec{V} \frac{(T - T_r)^2}{2} \right\rangle + \langle T' (\vec{V} \cdot \vec{\nabla}) \langle T \rangle \rangle + \vec{\nabla} \cdot \left\langle \left( \langle \vec{V} \rangle \frac{T'^2}{2} \right) \right\rangle - \vec{\nabla} \cdot \left\langle \left( \vec{V}' \frac{T'^2}{2} \right) \right\rangle \end{aligned} \quad (S10.3)$$

Consequently, the total advection term becomes:

$$\begin{aligned}
& \frac{C_p}{T_r} T' \left[ \left( \bar{V} \cdot \bar{\nabla} \right) T - \left\langle \left( \bar{V} \cdot \bar{\nabla} \right) T \right\rangle \right] - \frac{C_p}{T_r} (T - T_r) \left( \bar{V} \cdot \bar{\nabla} \right) T + \frac{C_p}{T_r} \langle T - T_r \rangle \left\langle \left( \bar{V} \cdot \bar{\nabla} \right) T \right\rangle \\
&= \left\{ \bar{\nabla} \cdot \left\{ \bar{V} \left( \frac{C_p}{2T_r} T'^2 \right) \right\} + \frac{C_p}{T_r} T' \left( \bar{V}' \cdot \bar{\nabla} \right) \langle T \rangle - \frac{C_p}{T_r} T' \left\langle \left( \bar{V}' \cdot \bar{\nabla} \right) T' \right\rangle \right\} - \bar{\nabla} \cdot \{ \bar{V} A \} \\
&+ \left\{ \bar{\nabla} \cdot \{ \bar{V} A \} - \left\langle \frac{C_p}{T_r} T' \left( \bar{V}' \cdot \bar{\nabla} \right) \langle T \rangle \right\rangle - \left\langle \frac{C_p}{T_r} T' \left( \langle \bar{V} \rangle \cdot \bar{\nabla} \right) T' \right\rangle - \left\langle \frac{C_p}{T_r} T' \left( \bar{V}' \cdot \bar{\nabla} \right) T' \right\rangle \right\} \\
&= \left\{ \bar{\nabla} \cdot \left[ \bar{V} \left( \frac{C_p}{2T_r} T'^2 \right) \right] + \frac{C_p}{T_r} T' \left( \bar{V}' \cdot \bar{\nabla} \right) \langle T \rangle - \frac{C_p}{T_r} T' \left\langle \left( \bar{V}' \cdot \bar{\nabla} \right) T' \right\rangle \right\} - \bar{\nabla} \cdot \{ \bar{V} A \} \\
&+ \left\{ \bar{\nabla} \cdot \langle \bar{V} A \rangle - \left\langle \frac{C_p}{T_r} T' \left( \bar{V}' \cdot \bar{\nabla} \right) \langle T \rangle \right\rangle - \bar{\nabla} \cdot \left\langle \bar{V} \left( \frac{C_p}{2T_r} T'^2 \right) \right\rangle \right\} \\
&= -\bar{\nabla} \cdot \left\{ \bar{V} \left( A - \frac{C_p}{2T_r} T'^2 \right) - \left\langle \bar{V} \left( A - \frac{C_p}{2T_r} T'^2 \right) \right\rangle \right\} + \frac{C_p}{T_r} \left\{ \left( T' \bar{V}' \cdot \bar{\nabla} \right) \langle T \rangle - \left\langle \left( T' \bar{V}' \cdot \bar{\nabla} \right) \langle T \rangle \right\rangle \right\} \\
&- \frac{C_p}{T_r} T' \left\langle \left( \bar{V}' \cdot \bar{\nabla} \right) T' \right\rangle
\end{aligned} \tag{S10.4}$$

Moreover

$$\frac{C_p}{T_r} T' \frac{\langle \omega \rangle \alpha_r}{C_p} = \langle \omega \rangle \alpha' \tag{S10.5}$$

$$\langle T - T_r \rangle \frac{\omega' R}{p} = \omega' (\langle \alpha \rangle - \alpha_r) \tag{S10.6}$$

so that

$$\begin{aligned}
\frac{\partial A_{X2}}{\partial t} &= -\bar{\nabla} \cdot \left\{ \bar{V} \left( A - \frac{C_p}{2T_r} T'^2 \right) - \left\langle \bar{V} \left( A - \frac{C_p}{2T_r} T'^2 \right) \right\rangle \right\} + \frac{C_p}{T_r} \left\{ \left( T' \bar{V}' \cdot \bar{\nabla} \right) \langle T \rangle - \left\langle \left( T' \bar{V}' \cdot \bar{\nabla} \right) \langle T \rangle \right\rangle \right\} \\
&- \frac{C_p}{T_r} T' \left\langle \left( \bar{V}' \cdot \bar{\nabla} \right) T' \right\rangle + \left[ (\langle \omega \rangle \alpha' + \omega' \langle \alpha \rangle) - \omega' \alpha_r \right] + \frac{1}{T_r} (T' \langle Q \rangle + \langle T - T_r \rangle Q')
\end{aligned} \tag{S10.7}$$



**SUPPLEMENTARY MATERIAL 11: Total kinetic energy retrieval**

We ensure that the computation of time-mean and time-variability kinetic energy budget were correct by summing all their contributions to retrieve the total kinetic energy equation terms obtained in the “Supplementary material”.

$$\begin{aligned}
 \frac{\partial K_M}{\partial t} &= - \left[ \begin{aligned} & - \left\langle \overline{V_h} \cdot (\overline{V} \cdot \overline{\nabla}) \cdot \overline{V_h} \right\rangle \\ & + \overline{\nabla} \cdot (\langle \overline{V} \rangle K_M) \\ & + \overline{\nabla} \cdot \left\langle \overline{V} \cdot (\overline{V_h} \cdot \overline{V_h}) \right\rangle \end{aligned} \right] - \left[ \langle \overline{V_h} \rangle \cdot \overline{\nabla_h} \langle \overline{\phi} \rangle \right] + \langle \overline{V_h} \rangle \cdot \langle \overline{F_h} \rangle \\
 \frac{\partial K_E}{\partial t} &= - \left[ \begin{aligned} & \left\langle \overline{V_h} \cdot (\overline{V} \cdot \overline{\nabla}) \cdot \overline{V_h} \right\rangle \\ & + \overline{\nabla} \cdot (\langle \overline{V} \rangle K_E) \\ & + \overline{\nabla} \cdot \left\langle \overline{V} \cdot \left( \frac{\overline{V_h} \cdot \overline{V_h}}{2} \right) \right\rangle \end{aligned} \right] - \left[ \langle \overline{V_h} \rangle \cdot \overline{\nabla_h} \langle \overline{\phi} \rangle \right] + \left[ \langle \overline{V_h} \rangle \cdot \overline{F_h} \right] \\
 \frac{\partial K_{X1}}{\partial t} &= - \left[ \begin{aligned} & \overline{\nabla} \cdot \left\{ \overline{V} \left( \frac{1}{2} V_h^2 \right) - \left\langle \overline{V} \left( \frac{1}{2} V_h^2 \right) \right\rangle \right\} + \\ & \left\{ \overline{V_h} \cdot (\overline{V} \cdot \overline{\nabla}) \cdot \overline{V_h} - \left\langle \overline{V_h} \cdot (\overline{V} \cdot \overline{\nabla}) \cdot \overline{V_h} \right\rangle \right\} \\ & - \overline{V_h} \cdot \left\langle (\overline{V} \cdot \overline{\nabla}) \cdot \overline{V_h} \right\rangle \end{aligned} \right] - \left[ \begin{aligned} & \left[ \overline{V_h} \cdot \overline{\nabla_h} \langle \overline{\phi} \rangle - \right. \\ & \left. \left\langle \overline{V_h} \cdot \overline{\nabla_h} \langle \overline{\phi} \rangle \right\rangle \right] + \left\{ \overline{V_h} \cdot \overline{F_h} - \left\langle \overline{V_h} \cdot \overline{F_h} \right\rangle \right\} \end{aligned} \right] \\
 \frac{\partial K_{X2}}{\partial t} &= - \left[ \begin{aligned} & \overline{\nabla} \cdot \left\{ \overline{V} \left( K - \frac{1}{2} V_h^2 \right) - \left\langle \overline{V} \left( K - \frac{1}{2} V_h^2 \right) \right\rangle \right\} - \\ & \left\{ \overline{V_h} \cdot (\overline{V} \cdot \overline{\nabla}) \cdot \overline{V_h} - \left\langle \overline{V_h} \cdot (\overline{V} \cdot \overline{\nabla}) \cdot \overline{V_h} \right\rangle \right\} \\ & + \overline{V_h} \cdot \left\langle (\overline{V} \cdot \overline{\nabla}) \cdot \overline{V_h} \right\rangle \end{aligned} \right] - \left[ \begin{aligned} & \left[ \overline{V_h} \cdot \overline{\nabla_h} \langle \overline{\phi} \rangle + \right. \\ & \left. \left\langle \overline{V_h} \cdot \overline{\nabla_h} \langle \overline{\phi} \rangle \right\rangle \right] + \left\{ \overline{V_h} \cdot \langle \overline{F_h} \rangle + \langle \overline{V_h} \rangle \cdot \overline{F_h} \right\} \end{aligned} \right] \\
 \dots\dots\dots \\
 \frac{\partial K}{\partial t} &= - (\overline{V} \cdot \overline{\nabla}) K - \overline{V_h} \cdot \overline{\nabla_h} \langle \overline{\phi} \rangle + \overline{V_h} \cdot \overline{F_h}
 \end{aligned}
 \tag{S11.1}$$

In fact, the sum of conversion and boundary fluxes terms appearing in  $K_M$ ,  $K_E$ ,  $K_{X1}$  and  $K_{X2}$  tendency equations is:

$$\begin{aligned}
& - \left[ \begin{aligned} & - \langle \vec{V}_h' \cdot (\vec{V}' \cdot \vec{\nabla}) \cdot \langle \vec{V}_h \rangle \rangle \\ & + \vec{\nabla} \cdot (\langle \vec{V} \rangle K_M) \\ & + \vec{\nabla} \cdot \langle \vec{V}' (\vec{V}_h' \cdot \langle \vec{V}_h \rangle) \rangle \end{aligned} \right] - \left[ \begin{aligned} & \langle \vec{V}_h' \cdot (\vec{V}' \cdot \vec{\nabla}) \cdot \langle \vec{V}_h \rangle \rangle \\ & + \vec{\nabla} \cdot (\langle \vec{V} \rangle K_E) \\ & + \vec{\nabla} \cdot \left\langle \vec{V}' \left( \frac{\vec{V}_h' \cdot \vec{V}_h'}{2} \right) \right\rangle \end{aligned} \right] \\
& - \left[ \begin{aligned} & \vec{\nabla} \cdot \left\{ \vec{V} \left( \frac{1}{2} V_h'^2 \right) - \left\langle \vec{V} \left( \frac{1}{2} V_h'^2 \right) \right\rangle \right\} + \\ & \left\{ \vec{V}_h' \cdot (\vec{V}' \cdot \vec{\nabla}) \cdot \langle \vec{V}_h \rangle - \langle \vec{V}_h' \cdot (\vec{V}' \cdot \vec{\nabla}) \cdot \langle \vec{V}_h \rangle \rangle \right\} \\ & - \vec{V}_h' \cdot \langle (\vec{V}' \cdot \vec{\nabla}) \cdot \vec{V}_h' \rangle \end{aligned} \right] - \left[ \begin{aligned} & \vec{\nabla} \cdot \left\{ \vec{V} \left( K - \frac{1}{2} V_h'^2 \right) - \left\langle \vec{V} \left( K - \frac{1}{2} V_h'^2 \right) \right\rangle \right\} - \\ & \left\{ \vec{V}_h' \cdot (\vec{V}' \cdot \vec{\nabla}) \cdot \langle \vec{V}_h \rangle - \langle \vec{V}_h' \cdot (\vec{V}' \cdot \vec{\nabla}) \cdot \langle \vec{V}_h \rangle \rangle \right\} \\ & + \vec{V}_h' \cdot \langle (\vec{V}' \cdot \vec{\nabla}) \cdot \vec{V}_h' \rangle \end{aligned} \right] \\
& = - \left\{ \vec{\nabla} \cdot (\langle \vec{V} \rangle (K_M + K_E)) + \vec{\nabla} \cdot \left\langle \vec{V}' \left( \vec{V}_h' \cdot \langle \vec{V}_h \rangle + \vec{V}' \left( \frac{\vec{V}_h' \cdot \vec{V}_h'}{2} \right) \right) \right\rangle \right\} - \vec{\nabla} \cdot \{ \vec{V} K - \langle \vec{V} K \rangle \} \\
& = - \left\{ \vec{\nabla} \cdot (\langle \vec{V} \rangle \langle K \rangle) + \vec{\nabla} \cdot \langle \vec{V}' K_X \rangle \right\} - \vec{\nabla} \cdot \{ \vec{V} K - \langle \vec{V} K \rangle \} \\
& = - \vec{\nabla} \cdot \langle \vec{V} K \rangle - \vec{\nabla} \cdot \{ \vec{V} K - \langle \vec{V} K \rangle \} \\
& = - \vec{\nabla} \cdot (\vec{V} K)
\end{aligned} \tag{S11.2}$$

The sum of contribution of geopotential heights appearing in  $K_M$ ,  $K_E$ ,  $K_{X1}$  and  $K_{X2}$  tendency equations is:

$$\begin{aligned}
& - \langle \vec{V}_h' \cdot \vec{\nabla}_h \langle \phi \rangle - \langle \vec{V}_h' \cdot \vec{\nabla}_h \phi' \rangle - (\vec{V}_h' \cdot \vec{\nabla}_h \phi' - \langle \vec{V}_h' \cdot \vec{\nabla}_h \phi' \rangle) - (\vec{V}_h' \cdot \vec{\nabla}_h \langle \phi \rangle + \langle \vec{V}_h' \cdot \vec{\nabla}_h \phi' \rangle) \\
& = - \langle \vec{V}_h' \cdot \vec{\nabla}_h \langle \phi \rangle - \vec{V}_h' \cdot \vec{\nabla}_h \phi' - (\vec{V}_h' \cdot \vec{\nabla}_h \langle \phi \rangle + \langle \vec{V}_h' \cdot \vec{\nabla}_h \phi' \rangle) \\
& = - (\langle \vec{V}_h' \cdot \vec{\nabla}_h \langle \phi \rangle + \langle \vec{V}_h' \cdot \vec{\nabla}_h \phi' \rangle) - (\vec{V}_h' \cdot \vec{\nabla}_h \phi' + \vec{V}_h' \cdot \vec{\nabla}_h \langle \phi \rangle) \\
& = - \langle \vec{V}_h' \cdot \vec{\nabla}_h \phi - \vec{V}_h' \cdot \vec{\nabla}_h \phi' \\
& = - \vec{V}_h' \cdot \vec{\nabla}_h \phi
\end{aligned} \tag{S11.3}$$

The sum of contribution to the dissipation of the kinetic energy appearing in  $K_M$ ,  $K_E$ ,  $K_{X1}$  and  $K_{X2}$  tendency equations is:

$$\begin{aligned}
& \langle \vec{V}_h' \cdot \langle \vec{F}_h \rangle + \langle \vec{V}_h' \cdot \vec{F}_h' \rangle + (\vec{V}_h' \cdot \vec{F}_h' - \langle \vec{V}_h' \cdot \vec{F}_h' \rangle) + (\vec{V}_h' \cdot \langle \vec{F}_h \rangle + \langle \vec{V}_h' \cdot \vec{F}_h' \rangle) \\
& = \langle \vec{V}_h' \cdot \langle \vec{F}_h \rangle + \vec{V}_h' \cdot \vec{F}_h' + \vec{V}_h' \cdot \langle \vec{F}_h \rangle + \langle \vec{V}_h' \cdot \vec{F}_h' \rangle \\
& = \vec{V}_h' \cdot \vec{F}_h
\end{aligned} \tag{S11.4}$$

Finally, we retrieve all terms present in “*Supplementary material*” (S1.1) and is a confirmation of the robustness of the kinetic energy equations developed in this paper.



### SUPPLEMENTARY MATERIAL 12: Total available potential energy retrieval

We ensure that the computation of time-mean and time-variability available enthalpy energy budget were correct by summing all their contributions to retrieve the total kinetic energy equation terms obtained in (S3.8).

$$\begin{aligned}
 \frac{\partial A_M}{\partial t} &= - \left[ \begin{aligned} & - \frac{C_p}{T_r} \left( \langle T' \bar{V}' \rangle \cdot \bar{\nabla} \right) \langle T \rangle \\ & + \bar{\nabla} \cdot \left( \langle \bar{V} \rangle A_M \right) \\ & + \bar{\nabla} \cdot \left\langle \bar{V}' \left( \frac{C_p}{T_r} \langle T - T_r \rangle T' \right) \right\rangle \end{aligned} \right] + \left( \langle \omega \rangle \langle \alpha \rangle - \langle \omega \rangle \alpha_r \right) + \left\langle \left( \frac{T}{T_r} - 1 \right) \right\rangle \langle Q \rangle \\
 \frac{\partial A_E}{\partial t} &= - \left[ \begin{aligned} & \frac{C_p}{T_r} \left( \langle T' \bar{V}' \rangle \cdot \bar{\nabla} \right) \langle T \rangle \\ & + \bar{\nabla} \cdot \left( \langle \bar{V} \rangle A_E \right) \\ & + \bar{\nabla} \cdot \left\langle \bar{V}' \left( \frac{C_p}{2T_r} T'^2 \right) \right\rangle \end{aligned} \right] - \left[ \langle \omega' \alpha' \rangle \right] + \left\langle \frac{T' Q'}{T_r} \right\rangle \\
 \frac{\partial A_{X1}}{\partial t} &= - \left[ \begin{aligned} & \bar{\nabla} \cdot \left\{ \bar{V} \left( \frac{C_p}{2T_r} T'^2 \right) - \left\langle \bar{V} \left( \frac{C_p}{2T_r} T'^2 \right) \right\rangle \right\} + \\ & \frac{C_p}{T_r} \left\{ \left( T' \bar{V}' \cdot \bar{\nabla} \right) \langle T \rangle - \left\langle \left( T' \bar{V}' \cdot \bar{\nabla} \right) \langle T \rangle \right\rangle \right\} \\ & - \frac{C_p}{T_r} T' \left\langle \left( \bar{V}' \cdot \bar{\nabla} \right) T' \right\rangle \end{aligned} \right] - \left\{ \omega' \alpha' - \langle \omega' \alpha' \rangle \right\} + \frac{1}{T_r} \left\{ T' Q' - \langle T' Q' \rangle \right\} \\
 \frac{\partial A_{X2}}{\partial t} &= - \left[ \begin{aligned} & \bar{\nabla} \cdot \left\{ \bar{V} \left( A - \frac{C_p}{2T_r} T'^2 \right) - \left\langle \bar{V} \left( A - \frac{C_p}{2T_r} T'^2 \right) \right\rangle \right\} - \\ & \frac{C_p}{T_r} \left\{ \left( T' \bar{V}' \cdot \bar{\nabla} \right) \langle T \rangle - \left\langle \left( T' \bar{V}' \cdot \bar{\nabla} \right) \langle T \rangle \right\rangle \right\} \\ & - \frac{C_p}{T_r} T' \left\langle \left( \bar{V}' \cdot \bar{\nabla} \right) T' \right\rangle \end{aligned} \right] - \left[ \begin{aligned} & \left( \langle \omega \rangle \alpha' + \omega' \langle \alpha \rangle \right) \\ & - \omega' \alpha_r \end{aligned} \right] + \frac{1}{T_r} \left( T' \langle Q \rangle + \langle T - T_r \rangle Q' \right) \\
 \dots\dots\dots \\
 \frac{\partial A}{\partial t} &= - \left( \bar{V} \cdot \bar{\nabla} \right) A - \omega \left( \alpha - \alpha_r \right) + \left( \frac{T}{T_r} - 1 \right) Q
 \end{aligned} \tag{S12.1}$$

The sum of conversion and boundary fluxes terms appearing in  $A_M$ ,  $A_E$ ,  $A_{X1}$  and  $A_{X2}$  tendency equations is:

$$\begin{aligned}
& - \left[ \begin{aligned} & -\frac{C_p}{T_r} \left( \langle T' \bar{V}' \rangle \cdot \bar{\nabla} \right) \langle T \rangle \\ & + \bar{\nabla} \cdot \left( \langle \bar{V} \rangle A_M \right) \\ & + \bar{\nabla} \cdot \left\langle \bar{V}' \left( \frac{C_p}{T_r} \langle T - T_r \rangle T' \right) \right\rangle \end{aligned} \right] - \left[ \begin{aligned} & \frac{C_p}{T_r} \left( \langle T' \bar{V}' \rangle \cdot \bar{\nabla} \right) \langle T \rangle \\ & + \bar{\nabla} \cdot \left( \langle \bar{V} \rangle A_E \right) \\ & + \bar{\nabla} \cdot \left\langle \bar{V}' \left( \frac{C_p}{2T_r} T'^2 \right) \right\rangle \end{aligned} \right] \\
& - \left[ \begin{aligned} & \bar{\nabla} \cdot \left\{ \bar{V} \left( \frac{C_p}{2T_r} T'^2 \right) - \left\langle \bar{V} \left( \frac{C_p}{2T_r} T'^2 \right) \right\rangle \right\} + \left[ \begin{aligned} & \bar{\nabla} \cdot \left\{ \bar{V} \left( A - \frac{C_p}{2T_r} T'^2 \right) - \left\langle \bar{V} \left( A - \frac{C_p}{2T_r} T'^2 \right) \right\rangle \right\} - \\ & - \frac{C_p}{T_r} \left\{ \left( T' \bar{V}' \cdot \bar{\nabla} \right) \langle T \rangle - \left\langle \left( T' \bar{V}' \cdot \bar{\nabla} \right) \langle T \rangle \right\rangle \right\} - \frac{C_p}{T_r} \left\{ \left( T' \bar{V}' \cdot \bar{\nabla} \right) \langle T \rangle - \left\langle \left( T' \bar{V}' \cdot \bar{\nabla} \right) \langle T \rangle \right\rangle \right\} \\ & - \frac{C_p}{T_r} T' \langle \left( \bar{V}' \cdot \bar{\nabla} \right) T' \rangle \end{aligned} \right] \left[ \begin{aligned} & - \frac{C_p}{T_r} T' \langle \left( \bar{V}' \cdot \bar{\nabla} \right) T' \rangle \end{aligned} \right] \\
& = -\bar{\nabla} \cdot \left\{ \langle \bar{V} \rangle \langle A \rangle - \langle \bar{V}' A_x \rangle \right\} - \bar{\nabla} \cdot \left\{ \bar{V} A - \langle \bar{V} A \rangle \right\} \\
& = -\bar{\nabla} \cdot \langle \bar{V} A \rangle - \bar{\nabla} \cdot \left\{ \bar{V} A - \langle \bar{V} A \rangle \right\} \\
& = -\bar{\nabla} \cdot \left( \bar{V} A \right)
\end{aligned}$$

(S12.2)

The sum of terms contributing to the diabatic heating in K<sub>M</sub>, K<sub>E</sub>, K<sub>X1</sub> and K<sub>X2</sub> tendency equations is:

$$\begin{aligned}
& \left\langle \left( \frac{T}{T_r} - 1 \right) \right\rangle \langle Q \rangle + \left\langle \frac{T' Q'}{T_r} \right\rangle + \frac{1}{T_r} \{ T' Q' - \langle T' Q' \rangle \} + \frac{1}{T_r} (T' \langle Q \rangle + \langle T - T_r \rangle Q') \\
& = \left\langle \left( \frac{T}{T_r} - 1 \right) \right\rangle \langle Q \rangle + \frac{T' Q'}{T_r} + \frac{1}{T_r} (T' \langle Q \rangle + \langle T - T_r \rangle Q') \\
& = \frac{1}{T_r} \{ \langle T \rangle \langle Q \rangle + T' Q' T' \langle Q \rangle + \langle T_r \rangle Q' \} - \{ \langle Q \rangle + Q' \} \\
& = \frac{1}{T_r} T Q - Q \\
& = \left( \frac{T}{T_r} - 1 \right) Q
\end{aligned}$$

(S12.3)

We retrieve all terms present in (S1.8) for the available enthalpy; this confirms the robustness of the available enthalpy equations developed in this paper.

## References

1. Marquet, P., *On the concept of exergy and available enthalpy: Application to atmospheric energetics*. Quarterly Journal of the Royal Meteorological Society, 1991. **117**(499): p. 449-475.
2. Nikiéma, O. and R. Laprise, *An approximate energy cycle for inter-member variability in ensemble simulations of a regional climate model*. Climate dynamics, 2013. **41**: p. 831-852.

**Disclaimer/Publisher's Note:** The statements, opinions and data contained in all publications are solely those of the individual author(s) and contributor(s) and not of MDPI and/or the editor(s). MDPI and/or the editor(s) disclaim responsibility for any injury to people or property resulting from any ideas, methods, instructions or products referred to in the content.
